# Supplementary material for: Feasibility of an individualised, task-oriented, video-supported home exercise programme for arm function in patients in the subacute phase after stroke: protocol of a randomised controlled pilot study
Source: HighWire-hosted journal article supplement (doi:10.1136/bmjopen-2021-051504), 2022-01-01
Supplement: bmjopen-2021-051504supp004_data_supplement.pdf [file bmjopen-2021-051504supp004_data_supplement.pdf]

Kurztitel: INAUVIS

Version 1.1 vom 08.11.2020

## ***PatientInneninformation und Einwilligungserklärung zur Teilnahme an der klinischen Studie***

### **Einsatz eines individualisierten, aufgabenorientierten, videounterstützten Heimübungsprogrammes bei subakuten Schlaganfallpatient\*innen mit leichter bis mittelschwerer Armparese: randomisierte, einfach verblindete, kontrollierte Machbarkeitsstudie**

Sehr geehrte Patientin, sehr geehrter Patient!

Wir laden Sie ein, an der oben genannten klinischen Studie teilzunehmen. Die Aufklärung darüber erfolgt in einem ausführlichen ärztlichen Gespräch.

**Ihre Teilnahme an dieser klinischen Studie erfolgt freiwillig. Sie können jederzeit ohne Angabe von Gründen aus der Studie ausscheiden. Die Ablehnung der Teilnahme oder ein vorzeitiges Ausscheiden aus dieser Studie hat keine nachteiligen Folgen für Ihre medizinische Betreuung.**

Klinische Studien sind notwendig, um verlässliche neue medizinische Forschungsergebnisse zu gewinnen. Unverzichtbare Voraussetzung für die Durchführung einer klinischen Studie ist jedoch, dass Sie Ihr Einverständnis zur Teilnahme an dieser klinischen Studie schriftlich erklären. Bitte lesen Sie den folgenden Text - als Ergänzung zum Informationsgespräch mit Ihrem Studienarzt - sorgfältig durch und zögern Sie nicht, Fragen zu stellen.

Bitte unterschreiben Sie die Einwilligungserklärung nur

- wenn Sie die Art und den Ablauf der klinischen Studie vollständig verstanden haben,
- wenn Sie bereit sind, der Teilnahme zuzustimmen und
- wenn Sie sich über Ihre Rechte als Teilnehmer\*in an dieser klinischen Studie im Klaren sind.

Zu dieser klinischen Studie sowie zur Patienteninformation und Einwilligungserklärung wurde von der zuständigen Ethikkommission eine befürwortende Stellungnahme abgegeben.

#### **1. Was ist der Zweck der klinischen Studie?**

Sie haben aufgrund eines Schlaganfalles eine Funktionseinschränkung Ihres Armes und/oder Ihrer Hand erlitten. Damit verbunden kann es Ihnen schwerfallen, den Arm und/oder die Hand zielgerichtet in Alltagsaktivitäten im häuslichen Umfeld, die für Sie wichtig sind, einzusetzen.

Aktuelle Leitlinien empfehlen, zusätzlich zur normalen Therapie das Training zu Hause mittels eines spezifischen, intensivierten Heimübungsprogrammes mit hoher Wiederholungsanzahl weiterzuführen.

Das Ziel der Studie ist es, zu untersuchen, ob ein individualisiertes, aufgabenorientiertes, videounterstütztes Heimübungsprogramm, angelehnt an aktuellste, lernmotorische Prinzipien der

Kurztitel: INAUVIS

Version 1.1 vom 08.11.2020

OPTIMAL-Theorie, bei Schlaganfallpatient\*innen mit leichter bis mittelschwerer Armlähmung durchführbar ist. Zudem sollten Ergebnisse zur Wirksamkeit erhoben werden, d.h., ob mit dem Heimübungsprogramm ein verbesserter Einsatz des betroffenen Armes/ der betroffenen Hand für die bedeutungsvollen Aktivitäten Ihres Alltags zu erreichen ist.

Verglichen wird dies mit einem individualisierten, aufgabenorientierten, papierbasierten Heimübungsprogramm, ebenfalls angelehnt an den aktuellsten, lernmotorischen Prinzipien der OPTIMAL-Theorie.

Bereits bestehende Studien zeigten gute Ergebnisse, sowohl hinsichtlich eines videounterstützten als auch für ein papierbasiertes Heimübungsprogramm bei Schlaganfallpatient\*innen mit Einschränkungen der Armbeweglichkeit.

### **Begriffserklärung „Machbarkeitsstudie“**

Eine Machbarkeitsstudie sammelt Informationen zur Durchführbarkeit einer geplanten Studie. Das Ziel dieser Machbarkeitsstudie ist die Untersuchung der Durchführbarkeit eines individualisierten, aufgabenorientierten, videounterstützten Heimübungsprogrammes, beruhend auf den lernmotorischen Prinzipien der OPTIMAL-Theorie für eine mögliche Folgestudie.

## **2. Wie läuft die klinische Studie ab?**

Diese klinische Studie wird an der Universitätsklinik für Neurologie an der Medizinischen Universität Innsbruck durchgeführt. Es werden insgesamt ungefähr 24 Personen daran teilnehmen.

Ihre Teilnahme an dieser klinischen Studie wird voraussichtlich 8 Wochen dauern. Davon sind 4 Wochen für die Durchführung des Heimübungsprogrammes - 6x pro Woche zu je 45-60 - Minuten vorgesehen. Nach weiteren 4 Wochen ohne das zusätzliche Heimübungsprogramm findet eine Nachuntersuchung statt.

### Folgende Maßnahmen werden ausschließlich aus Studiengründen durchgeführt:

Während Ihres stationären Aufenthaltes bzw. am Tag Ihrer Stroke Card Untersuchung wird die erste Untersuchung für die Studie durchgeführt. Vor dem Unterschreiben der Einwilligungserklärung erfolgt ein ausführliches ärztliches Gespräch über die klinische Studie. Ebenso werden Informationen zu Ihrer neurologischen Vorgeschichte auf Basis von vorhandenen stationären/ambulanten Arztbriefen erhoben. Nachfolgend werden Sie von ergotherapeutischer Seite hinsichtlich Ihrer Symptomatik evaluiert.

Per Zufallsprinzip werden Sie einem der beiden Heimübungsprogramme zugeteilt:

- 1. Papierbasiertes Heimübungsprogramm:** Sie erhalten eine Mappe mit einer Sammlung von Übungen mit Fotos. Zusätzlich bekommen Sie ein Logbuch, in dem Sie Ihren Übungsverlauf der 4 Wochen täglich eintragen. Zu Beginn erstellen Sie mit der Therapeutin gemeinsam Wochenziele. Die Therapeutin wählt entsprechend Ihrer Wochenziele die Übungen mit Ihnen aus. Die Empfehlung der Wiederholungsanzahl jeder Übung wird im Logbuch notiert.

### **ODER**

- 2. Videounterstütztes Heimübungsprogrammes:** Sie erhalten ein Android-Tablet mit Zugang zu einer Übungsplattform. Zu Beginn erstellen Sie mit der Therapeutin gemeinsam Wochenziele. Die Therapeutin wählt entsprechend Ihrer Wochenziele Übungen mit Ihnen aus. Auf der Übungsplattform bekommen Sie den Zugang zu den Übungen mit den Videos. Ihr Übungsverlauf erfolgt in den 4 Wochen über die Plattform.

Kurztitel: INAUVIS

Version 1.1 vom 08.11.2020

Das Ziel ist es, das Heimübungsprogramm 6x pro Woche für 45-60 Minuten durchzuführen. Innerhalb der 4 Wochen, werden Sie 3x telefonisch für eine kurze Zwischenanalyse nach jeder Woche, für eine neuerliche Zielformulierung und zur Anpassung Ihres Heimübungsprogrammes kontaktiert.

Nach 4 Wochen wird eine ambulante Untersuchung durchgeführt. Sie werden gebeten, hierzu in die Universitätsklinik für Neurologie in Innsbruck, Neurorehabilitative Therapie, zu kommen. Zusätzlich ist ein ca. 20-30 minütiges Interview geplant, mit Fragen zu Ihren Erfahrungen mit dem Heimübungsprogramm. Dieses Interview wird mit einem Audio-Aufnahmegerät aufgezeichnet. Die erhobenen Daten werden ausschließlich im Rahmen dieser klinischen Studie ausgewertet. Hierfür können Sie unabhängig von der Einwilligungserklärung zur Teilnahme an der klinischen Studie Ihre Einwilligung geben.

Nach weiteren 4 Wochen wird eine Nachuntersuchung (Follow-Up) zur Effektivitätskontrolle und RestbeschwerdeEinstufung für Sie organisiert. Sie werden gebeten, hierzu in die Universitätsklinik für Neurologie in Innsbruck, Neurorehabilitative Therapie, zu kommen.

Nach dieser letzten ambulanten Kontrolle ist die Studie für Sie beendet. Ihre Daten werden indirekt personenbezogen, d.h. Ihr Name wird durch einen Code ersetzt, in eine Datenbank übertragen, um eine Auswertung gemäß der geltenden Datenschutzbestimmungen zu gewährleisten.

Insgesamt sind zwei Besuche (exklusive Erstuntersuchung) notwendig. Die Einhaltung der Besuchstermine, einschließlich der Anweisungen des Studienarztes ist für den Erfolg dieser klinischen Studie von entscheidender Bedeutung.

### **3. Worin liegt der Nutzen einer Teilnahme an der Klinischen Studie?**

Sollte die Intervention effektiv sein, haben die Teilnehmer\*innen beider Gruppen einen direkten Nutzen.

Die Studie dient als Basis für weiterführende Studien für Schlaganfallpatient\*innen mit leichter bis mittelschwerer Armparese.

### **4. Gibt es Risiken, Beschwerden und Begleiterscheinungen?**

Dem zu erwartenden Nutzen für die Forschung stehen nach derzeitigem medizinischem Wissen ein geringes Gesundheitsrisiko und lediglich geringe Belastungen der Teilnehmer\*innen gegenüber.

Die Anreise zur Universitätsklinik für Neurologie, Medizinische Universität Innsbruck zu den beiden Nachuntersuchungen, die körperliche Untersuchung, die Erhebung der Werte der Assessments und die Befragung stellen ein geringes Gesundheitsrisiko dar.

### **5. Hat die Teilnahme an der klinischen Studie sonstige Auswirkungen auf die Lebensführung und welche Verpflichtungen ergeben sich daraus?**

Es handelt sich um ein intensiviertes Therapieprogramm, welches erhöhtes Engagement und erhöhten Zeitaufwand erfordert. Falls Sie bereits an anderen klinischen Studien teilnehmen, ist es sinnvoll, vorab

Kurztitel: INAUVIS

Version 1.1 vom 08.11.2020

eine Absprache mit den jeweiligen zuständigen Prüfern dieser anderen Studien zu halten, um mögliche Interaktionen zu klären.

## 6. Was ist zu tun beim Auftreten von Symptomen, Begleiterscheinungen und/oder Verletzungen?

Sollten im Verlauf der klinischen Studie irgendwelche Symptome, Begleiterscheinungen oder Verletzungen auftreten, müssen Sie diese Ihrem Studienarzt mitteilen, bei schwerwiegenden Begleiterscheinungen gegebenenfalls umgehend telefonisch (Telefonnummern, etc. siehe unten).

## 7. Versicherung

Als Teilnehmer an dieser klinischen Studie besteht für Sie der gesetzlich vorgeschriebene verschuldensunabhängige Versicherungsschutz, der alle Schäden abdeckt, die an Ihrem Leben oder Ihrer Gesundheit durch die an Ihnen durchgeführten Maßnahmen der klinischen Studie verursacht werden können, mit Ausnahme von Schäden auf Grund von Veränderungen des Erbmateri als in Zellen der Keimbahn.

Die Versicherung wurde für Sie bei der Zürich Versicherungs -Aktiengesellschaft, [REDACTED], A-1010 Wien, Tel.: [REDACTED] unter der Polizzenummer [REDACTED] abgeschlossen. Auf Wunsch können Sie in die Versicherungsunterlagen Einsicht nehmen.

Im Schadensfall können Sie sich direkt an den Versicherer wenden und Ihre Ansprüche selbständig geltend machen. Für den Versicherungsvertrag ist österreichisches Recht anwendbar. Die Versicherungsansprüche sind in Österreich einklagbar.

Zur Unterstützung können Sie sich auch an die Patientenvertretung wenden.

Um den Versicherungsschutz nicht zu gefährden

- dürfen Sie sich während der Dauer der klinischen Studie einer anderen medizinischen Behandlung nur im Einvernehmen mit Ihrem behandelnden Studienarzt unterziehen (ausgenommen davon sind Notfälle). Dies gilt auch für die zusätzliche Einnahme von Medikamenten oder die Teilnahme an einer anderen Studie.
- müssen Sie dem behandelnden Studienarzt oder der oben genannten Versicherungsgesellschaft eine Gesundheitsschädigung, die als Folge der klinischen Studie eingetreten sein könnte, unverzüglich mitteilen.
- müssen Sie alles Zumutbare tun, um Ursache, Hergang und Folgen des Versicherungsfalles aufzuklären und den entstandenen Schaden gering zu halten. Dazu gehört ggf. auch, dass Sie Ihre behandelnden Ärzte ermächtigen, vom Versicherer geforderte Auskünfte zu erteilen.

Wir machen Sie darauf aufmerksam, dass die Versicherung keinen Schutz bietet für einen Unfall, der Ihnen auf dem Weg zur und von der Teilnahme an der Studie zustößt.

Kurztitel: INAUVIS

Version 1.1 vom 08.11.2020

## 8. Wann wird die klinische Studie vorzeitig beendet?

Sie können jederzeit auch ohne Angabe von Gründen, Ihre Teilnahmebereitschaft widerrufen und aus der klinischen Studie ausscheiden, ohne dass Ihnen dadurch irgendwelche Nachteile für Ihre weitere medizinische Betreuung entstehen.

Ihr Studienarzt wird Sie über alle neuen Erkenntnisse, die in Bezug auf diese klinische Studie bekannt werden und für Sie wesentlich werden könnten, umgehend informieren. Auf dieser Basis können Sie dann Ihre Entscheidung zur **weiteren** Teilnahme an dieser klinischen Studie neu überdenken.

Es ist aber auch möglich, dass Ihr Studienarzt entscheidet, Ihre Teilnahme an der klinischen Studie vorzeitig zu beenden, ohne vorher Ihr Einverständnis einzuholen. Die Gründe hierfür können sein:

- a) Sie können den Erfordernissen der klinischen Studie nicht entsprechen.
- b) Ihr Studienarzt hat den Eindruck, dass eine weitere Teilnahme an der klinischen Studie nicht in Ihrem Interesse ist.

## 9. Datenschutz

Im Rahmen dieser klinischen Studie werden Daten über Sie erhoben und verarbeitet. Es ist grundsätzlich zu unterscheiden zwischen

- 1) jenen personenbezogenen Daten, anhand derer eine Person direkt identifizierbar ist (z.B. Name, Geburtsdatum, Adresse, Sozialversicherungsnummer, Bildaufnahmen,...).
- 2) pseudonymisierten personenbezogenen Daten, das sind Daten, bei denen alle Informationen, die direkte Rückschlüsse auf die konkrete Person zulassen, entweder entfernt, durch einen Code (z. B. eine Zahl) ersetzt oder (z.B. im Fall von Bildaufnahmen) unkenntlich gemacht werden. Es kann jedoch trotz Einhaltung dieser Maßnahmen nicht vollkommen ausgeschlossen werden, dass es unzulässigerweise zu einer Re-Identifizierung kommt.
- 3) anonymisierten Daten, bei denen eine Rückführung auf die konkrete Person ausgeschlossen werden kann.

Zugang zu den Daten, anhand derer Sie direkt identifizierbar sind (siehe Punkt 1), haben der Studienarzt und andere Mitarbeiter\*innen des Studienzentrums, die an der klinischen Studie oder Ihrer medizinischen Versorgung mitwirken. Zusätzlich können autorisierte und zur Verschwiegenheit verpflichtete Beauftragte des Sponsors [REDACTED] sowie Beauftragte von in- und/oder ausländischen Gesundheitsbehörden und die jeweils zuständige Ethikkommissionen in diese Daten Einsicht nehmen, soweit dies für die Überprüfung der ordnungsgemäßen Durchführung der klinischen Studie notwendig bzw. vorgeschrieben ist. Sämtliche Personen, die Zugang zu diesen Daten erhalten, unterliegen im Umgang mit den Daten den jeweils geltenden nationalen Datenschutzbestimmungen und/oder der EU-Datenschutz-Grundverordnung (DSGVO).

Der Code, der eine Zuordnung der pseudonymisierten Daten zu Ihrer Person ermöglicht, wird nur an Ihrem Studienzentrum aufbewahrt.

Für etwaige Veröffentlichungen werden nur die pseudonymisierten oder anonymisierten Daten verwendet.

Kurztitel: INAUVIS

Version 1.1 vom 08.11.2020

Im Rahmen dieser klinischen Studie ist keine Weitergabe von Daten in Länder außerhalb der EU (Drittland) vorgesehen.

Ihre Einwilligung bildet die Rechtsgrundlage für die Verarbeitung Ihrer personenbezogenen Daten. Sie können die Einwilligung zur Erhebung und Verarbeitung Ihrer Daten jederzeit ohne Begründung widerrufen. Nach Ihrem Widerruf werden keine weiteren Daten mehr über Sie erhoben. Die bis zum Widerruf erhobenen Daten können allerdings weiter im Rahmen dieser klinischen Studie verarbeitet werden.

Nach der DSGVO stehen Ihnen grundsätzlich die Rechte auf Auskunft, Berichtigung, Löschung, Einschränkung der Verarbeitung, Datenübertragbarkeit und Widerspruch zu, soweit dies die Ziele der klinischen Studie nicht unmöglich macht oder ernsthaft beeinträchtigt und soweit dem nicht andere gesetzliche Vorschriften widersprechen.

Die voraussichtliche Dauer der klinischen Studie ist 12 Monate. Die Dauer der Speicherung Ihrer Daten über das Ende oder den Abbruch der klinischen Studie hinaus ist durch Rechtsvorschriften geregelt.

Falls Sie Fragen zum Umgang mit Ihren Daten in dieser klinischen Studie haben, wenden Sie sich zunächst an Ihren Studienarzt. Dieser kann Ihr Anliegen ggf. an die Personen, die für den Datenschutz verantwortlich sind, weiterleiten.

Kontaktadressen der Datenschutzbeauftragten der an dieser klinischen Studie beteiligten Institutionen:

- Datenschutzbeauftragter der Med. Universität Innsbruck: datenschutzbeauftragter@i-med.ac.at
- Datenschutzbeauftragte der Tirol Kliniken: datenschutzbeauftragte@tirol-kliniken.at
- Sie haben das Recht, bei der Österreichischen Datenschutzbehörde eine Beschwerde über den Umgang mit Ihren Daten einzubringen ( [REDACTED] ).

## 10. Datenschutz der INAUVIS Plattform

Ihre Zugangsdaten, wie Benutzername und Passwort, sind pseudoanonymisiert. Sie müssen keine personenbezogenen Daten, wie z.B. Alter oder Geschlecht, auf der Plattform angeben. Die Anmeldung erfolgt beim ersten Login durch die Therapeutin.

Die pseudonymisierten Daten über Ihre Zugriffe auf die Plattform werden aufgezeichnet und auf einem studienspezifischen Server in Steinach am Brenner gespeichert.

Folgende Daten werden protokolliert:

- Uhrzeit zum Zeitpunkt Ihres Zugriffs
- besuchte Videos mit Zeitstempel
- Aktivitäten des Benutzers (datenschutzkonform).

Die erhobenen und gespeicherten Daten werden automatisch nach Ablauf des Studienzeitraumes gelöscht.

Folgende Daten werden für die Auswertung der Studie verwendet:

- Anzahl der Wiederholungen pro Übung
- Bewertung der Patient\*innen nach jeder Übung
- Bewertung der Patient\*innen gesamt
- Aktivitäten des Benutzers.

Kurztitel: INAUVIS

Version 1.1 vom 08.11.2020

Die Daten der Plattform werden vertraulich behandelt. Die Datenübermittlungen werden durch Verschlüsselungen nach dem anerkannten Stand der Technik gegen Zugriff durch Dritte geschützt.

Sie haben das Recht, Auskunft darüber zur erhalten, welche Daten gespeichert wurden, das Recht auf Berichtigung und Löschung von Daten, das Recht auf Widerruf erteilter Einwilligungen, das Recht auf Einschränkung der Verarbeitung und das Recht auf Widerspruch gegen die Verarbeitung.

## 11. Entstehen für die Teilnehmer Kosten? Gibt es einen Kostenersatz oder eine Vergütung?

Durch Ihre Teilnahme an dieser klinischen Studie entstehen für Sie keine zusätzlichen Kosten. Die möglicherweise anfallenden Reisekosten können wir Ihnen leider nicht ersetzen.

## 12. Möglichkeit zur Diskussion weiterer Fragen

Für weitere Fragen im Zusammenhang mit dieser klinischen Studie stehen Ihnen Ihr Studienarzt und seine Mitarbeiter gern zur Verfügung. Auch Fragen, die Ihre Rechte als Patient und Teilnehmer an dieser klinischen Studie betreffen, werden Ihnen gerne beantwortet.

Name der Kontaktperson: [REDACTED]

Tel.: [REDACTED], Mo-Fr von 08:00 bis 15:00

Sollten Sie Fragen zur Einverständniserklärung haben, können Sie sich gerne auch an die Tiroler Patientenvertretung wenden:

[REDACTED]

[REDACTED]

[REDACTED]

A-6020 Innsbruck

Tel.: [REDACTED]

Fax: [REDACTED]

Email: [REDACTED]

WWW: [REDACTED]

Kurztitel: INAUVIS

Version 1.1 vom 08.11.2020

### 13. Einwilligungserklärung

Name des\*r Patient\*in: .....

Geb.-Datum: .....

Ich erkläre mich bereit, an der klinischen Studie **Einsatz eines individualisierten, aufgabenorientierten, videounterstützten Heimübungsprogrammes bei subakuten Schlaganfallpatient\*innen mit leichter bis mittelschwerer Armparese: randomisierte, einfach verblindete, kontrollierte Machbarkeitsstudie** teilzunehmen. Ich bin darüber aufgeklärt worden, dass ich die Teilnahme ohne nachteilige Folgen, insbesondere für meine medizinische Betreuung, ablehnen kann.

Ich bin von Frau/Herrn (Dr.med.) ..... ausführlich und verständlich über die klinische Studie, mögliche Belastungen und Risiken, sowie über Wesen, Bedeutung und Tragweite der klinischen Studie und die sich für mich daraus ergebenden Anforderungen aufgeklärt worden. Ich habe darüber hinaus den Text dieser Patientenaufklärung und Einwilligungserklärung, die insgesamt 9 Seiten umfasst, gelesen. Aufgetretene Fragen wurden mir vom Studienarzt verständlich und zufriedenstellend beantwortet. Ich hatte ausreichend Zeit, mich zu entscheiden. Ich habe zurzeit keine weiteren Fragen mehr.

Ich werde den ärztlichen Anordnungen, die für die Durchführung der klinischen Studie erforderlich sind, Folge leisten, behalte mir jedoch das Recht vor, meine freiwillige Mitwirkung jederzeit zu beenden, ohne dass mir daraus Nachteile, insbesondere für meine medizinische Betreuung, entstehen.

Ich stimme ausdrücklich zu, dass meine im Rahmen dieser klinischen Studie erhobenen Daten, wie im Abschnitt „Datenschutz“ dieses Dokuments beschrieben, verarbeitet werden.

Eine Kopie dieser Patienteninformation und Einwilligungserklärung habe ich erhalten. Das Original verbleibt beim Studienarzt.

.....  
(Datum und Unterschrift des\*r Patient\*in)

.....  
(Datum, Name und Unterschrift des\*r verantwortlichen Studienarztes\*ärztin)

(Der\*die Patient\*in erhält eine unterschriebene Kopie der Patienteninformation und Einwilligungserklärung, das Original verbleibt im Studienordner des Studienarztes.)



Kurztitel: INAUVIS

Version 1.1 vom 08.11.2020

## 14. Einwilligungserklärung zur Audio-Aufzeichnung des Interviews

Name des\*r Patient\*in: .....

Geb.-Datum: .....

Ich erkläre mich bereit, dass im Rahmen der klinischen Studie **Einsatz eines individualisierten, aufgabenorientierten, videounterstützten Heimübungsprogrammes bei subakuten Schlaganfallpatient\*innen mit leichter bis mittelschwerer Armparese: randomisierte, einfach verblindete, kontrollierte Machbarkeitsstudie** Daten des Interviews mittels Audioaufnahme erhoben und ausgewertet werden dürfen.

Ich bin über die Art und den Umfang der Erhebung, der Verschriftlichung, Datenspeicherung und Auswertung des von mir gegebenen Interviews persönlich und schriftlich informiert worden und einverstanden,

- dass das Interview digital durch Audioaufnahme aufgezeichnet wird,
- dass das Interview transkribiert und indirekt personenbezogen anonymisiert (das heißt, der Name wird durch einen Code ersetzt) wird,
- dass Ausschnitte des Interviews in transkribierter und indirekt personenbezogener anonymisierter bzw. anonymisierter Form im Rahmen der klinischen Studie interpretiert und in einer daraus hervorgehenden Veröffentlichung verwendet werden.

Ich bin darüber aufgeklärt worden, dass ich die Teilnahme ohne nachteilige Folgen, insbesondere für meine medizinische Betreuung, ablehnen und die Einwilligung jederzeit widerrufen kann.

Eine Kopie dieser Einwilligungserklärung habe ich erhalten. Das Original verbleibt beim Studienarzt.

.....

(Datum und Unterschrift des\*r Patient\*in)

.....

(Datum, Name und Unterschrift des\*r verantwortlichen Studienarztes\*ärztin)

(Der\*die Patient\*in erhält eine unterschriebene Kopie der Patienteninformation und Einwilligungserklärung, das Original verbleibt im Studienordner des Studienarztes.)
