# Supplementary material for: Feasibility of an individualised, task-oriented, video-supported home exercise programme for arm function in patients in the subacute phase after stroke: protocol of a randomised controlled pilot study
Source: HighWire-hosted journal article supplement (doi:10.1136/bmjopen-2021-051504), 2022-01-01
Supplement: bmjopen-2021-051504supp005_data_supplement.pdf [file bmjopen-2021-051504supp005_data_supplement.pdf]

**Supplemental Table 1** Semi-structured interview questions

| No | Question                                                                                                                                                                                                        |
|----|-----------------------------------------------------------------------------------------------------------------------------------------------------------------------------------------------------------------|
| 1  | Can you please share your experiences with the home exercise programme (e.g., instructions, pictures, videos, logbook, platform, amount, duration and personal evaluation)?                                     |
| 2. | Please tell me about your experiences with the weekly phone calls (e.g., questions about evaluation, goal setting, amount and duration).                                                                        |
| 3. | Tell me about your experiences with personal goal setting (e.g., joint goal agreement, duration, amount, goal setting and specific example of a goal).                                                          |
| 4. | Describe your observations with regard to the use of your affected arm or your affected hand in everyday life. (e.g., specific example, self-care, domestic life, work and employment, recreation and leisure). |
| 5. | Who or what supported you in attending the home exercise programme (e.g., family, friends and telephone contact)?                                                                                               |
| 6. | What should the home exercise programme be like that you would carry it out for a longer period of time?                                                                                                        |
| 7. | How should the home exercise programme be for you to recommend it to others?                                                                                                                                    |
