# Supplementary material for: Feasibility of an individualised, task-oriented, video-supported home exercise programme for arm function in patients in the subacute phase after stroke: protocol of a randomised controlled pilot study
Source: HighWire-hosted journal article supplement (doi:10.1136/bmjopen-2021-051504), 2022-01-01
Supplement: bmjopen-2021-051504supp006_data_supplement.pdf [file bmjopen-2021-051504supp006_data_supplement.pdf]

**Supplemental Table 2** Schedule of enrolment, intervention and data collection during the study

|                                                                                            | STUDY PERIOD |            |                   |                     |                     |
|--------------------------------------------------------------------------------------------|--------------|------------|-------------------|---------------------|---------------------|
|                                                                                            | Enrolment    | Allocation | Post-allocation   |                     |                     |
|                                                                                            | Screening    |            | Pre-test<br>Day 1 | Post-test<br>Week 4 | Follow-up<br>Week 8 |
| TIMEPOINT                                                                                  | $-t_1$       | 0          | $t_1$             | $t_2$               | $t_3$               |
| <b>ENROLMENT</b>                                                                           |              |            |                   |                     |                     |
| Eligibility screen                                                                         | X            |            |                   |                     |                     |
| Informed consent                                                                           | X            |            |                   |                     |                     |
| Allocation                                                                                 |              | X          |                   |                     |                     |
| <b>INTERVENTIONS</b>                                                                       |              |            |                   |                     |                     |
| Video group                                                                                |              |            | ←————→            |                     |                     |
| Paper group                                                                                |              |            | ←————→            |                     |                     |
| <b>OUTCOMES (ASSESSMENTS)</b>                                                              |              |            |                   |                     |                     |
| <b>Baseline variables</b>                                                                  |              |            |                   |                     |                     |
| Demographics                                                                               | X            |            |                   |                     |                     |
| Clinical characteristics (Motricity Index, modified Rankin Scale, Mini-Mental-Status-Test) | X            |            |                   |                     |                     |
| <b>Primary outcomes</b>                                                                    |              |            |                   |                     |                     |
| Feasibility                                                                                |              |            |                   |                     |                     |
| Recruitment rate                                                                           |              |            | X                 | X                   | X                   |
| Retention rate                                                                             |              |            |                   |                     | X                   |

|                                                                                                                       |  |  |   |   |   |
|-----------------------------------------------------------------------------------------------------------------------|--|--|---|---|---|
| <i>Adherence rate</i>                                                                                                 |  |  | X | X | X |
| <i>Adverse events</i>                                                                                                 |  |  |   | X | X |
| <i>Adherence and satisfaction<br/>(logbook, platform recording,<br/>weekly interviews)</i>                            |  |  |   | X |   |
| <i>Acceptability (semi-structured<br/>interviews)</i>                                                                 |  |  |   | X |   |
| <b>Secondary outcome</b>                                                                                              |  |  |   |   |   |
| <i>Self-perceived arm and hand use<br/>(Motor Activity Log-30)</i>                                                    |  |  | X | X | X |
| <i>Arm motor function<br/>(Action Research Arm Test)</i>                                                              |  |  | X | X | X |
| <i>Finger dexterity<br/>(Nine Hole Peg Test)</i>                                                                      |  |  | X | X | X |
| <i>Gross motor hand and arm<br/>dexterity (Box and Block Test)</i>                                                    |  |  | X | X | X |
| <i>Hand strength (dynamometer)</i>                                                                                    |  |  | X | X | X |
| <i>Independence in activities of daily<br/>living (Score of Independence for<br/>Neurologic and Geriatric Rehab.)</i> |  |  | X | X | X |
| <i>Health-related quality of life<br/>(European Quality of Life-5 Dim.)</i>                                           |  |  | X | X | X |
| <i>Goal achievement<br/>(Goal Attainment scaling)</i>                                                                 |  |  |   | X |   |
